# Supplementary material for: Presence of Virulence Genes inEnterococcusSpecies Isolated from Meat Turkeys in Germany Does Not Correlate with Chicken Embryo Lethality
Source: Hindawi journal article supplement (doi:10.1155/2019/6147695), 2019-10-30
Supplement: f1 [file 6147695.f1.pdf]

## SUPPLEMENTARY MATERIAL

### **Presence of virulence genes in *Enterococcus* species isolated from meat turkeys in Germany does not correlate with chicken embryo lethality**

Julia Maasjost<sup>1</sup>, Dörte Lüscho<sup>1</sup>, Anne Kleine<sup>1</sup>, Hafez M. Hafez<sup>1,§</sup>, Kristin Mühldorfer<sup>1,2,§</sup>

<sup>1</sup>Institute of Poultry Diseases, Freie Universität Berlin, 14163 Berlin, Germany

<sup>§</sup> contributed equally to this work

Correspondence should be addressed to Kristin Mühldorfer; [muehldorfer@izw-berlin.de](mailto:muehldorfer@izw-berlin.de)

<sup>2</sup>current affiliation: Leibniz Institute for Zoo and Wildlife Research, 10315 Berlin, Germany

**Table S1:** Details on multiplex PCR primers used for virulence gene detection

| PCR target                   | Gene                     | Primer  | Sequence (5' - 3')              | Product | Reference |
|------------------------------|--------------------------|---------|---------------------------------|---------|-----------|
| Cytolysin                    | <i>cyLL<sub>L</sub></i>  | CyILL1  | GAT GGA GGG TAA GAA TTA TGG     | 253 bp  | [1]       |
|                              |                          | CyILL2  | GCT TCA CCT CAC TAA GTT TTA TAG |         |           |
|                              | <i>cyLL<sub>S</sub></i>  | CyILS1  | GAA GCA CAG TGC TAA ATA AGG     | 240 bp  | [1]       |
|                              |                          | CyILS2  | GTA TAA GAG GGC TAG TTT CAC     |         |           |
|                              | <i>cyIM</i>              | TE 13   | CTG ATG GAA AGA AGA TAG TAT     | 742 bp  | [2]       |
|                              |                          | TE 14   | TGA GTT GGT CTG ATT ACA TTT     |         |           |
|                              | <i>cyIB</i>              | TE 15   | ATT CCT ACC TAT GTT CTG TTA     | 843 bp  | [2]       |
|                              |                          | TE 16   | AAT AAA CTC TTC TTT TCC AAC     |         |           |
|                              | <i>cyIA</i>              | CYT_I   | ACT CGG GGA TTG ATA GGC         | 688 bp  | [3]       |
|                              |                          | CYT_IIb | GCT GCT AAA GCT GCG CTT         |         |           |
| Gelatinase                   | <i>gelE</i>              | GEL 11  | TAT GAC AAT GCT TTT TGG GAT     | 213 bp  | [4]       |
|                              |                          | GEL 12  | AGA TGC ACC CGA AAT AAT ATA     |         |           |
| Hyaluronidase                | <i>hyl<sub>Efm</sub></i> | HYL n1  | ACA GAA GAG CTG CAG GAA ATG     | 276 bp  | [4]       |
|                              |                          | HYL n2  | GAC TGA CGT CCA AGT TTC CAA     |         |           |
| Aggregation substance        | <i>asa1</i>              | ASA 11  | GCA CGC TAT TAC GAA CTA TGA     | 375 bp  | [4]       |
|                              |                          | ASA 12  | TAA GAA AGA ACA TCA CCA CGA     |         |           |
| Enterococcal surface protein | <i>esp</i>               | ESP 14F | AGA TTT CAT CTT TGA TTC TTG G   | 510 bp  | [5]       |
|                              |                          | ESP 12R | AAT TGA TTC TTT AGC ATC TGG     |         |           |

**Table S2:** Details on primers used for individual PCRs and Sanger sequencing

| PCR target            | Gene                     | Primer  | Sequence (5' - 3')              | Product | Reference |
|-----------------------|--------------------------|---------|---------------------------------|---------|-----------|
| Cytolysin             | <i>cyLL<sub>L</sub></i>  | CyILL1  | GAT GGA GGG TAA GAA TTA TGG     | 253 bp  | [1]       |
|                       |                          | CyILL2  | GCT TCA CCT CAC TAA GTT TTA TAG |         |           |
|                       | <i>cyLL<sub>S</sub></i>  | cyILS-F | AGA ACT TGT TGG TCC TTC         | 134 bp  | [6]       |
|                       |                          | cyILS-R | GCT GAA AAT AAT GCA CCT AC      |         |           |
|                       | <i>cyIM</i>              | TE 13   | CTG ATG GAA AGA AGA TAG TAT     | 742 bp  | [2]       |
|                       |                          | TE 14   | TGA GTT GGT CTG ATT ACA TTT     |         |           |
|                       | <i>cyIB</i>              | TE 15   | ATT CCT ACC TAT GTT CTG TTA     | 843 bp  | [2]       |
|                       |                          | TE 16   | AAT AAA CTC TTC TTT TCC AAC     |         |           |
|                       | <i>cyIA</i>              | TE 17   | TGG ATG ATA GTG ATA GGA AGT     | 688 bp  | [2]       |
|                       |                          | CYT_IIb | GCT GCT AAA GCT GCG CTT         |         |           |
| Gelatinase            | <i>gelE</i>              | TE 9    | ACC CCG TAT CAT TGG TTT         | 213 bp  | [4]       |
|                       |                          | GEL 12  | AGA TGC ACC CGA AAT AAT ATA     |         |           |
| Hyaluronidase         | <i>hyl<sub>Efm</sub></i> | hylEfm1 | GAG TAG AGG AAT ATC TTA GC      | 661 bp  | [7]       |
|                       |                          | hylEfm2 | AGG CTC CAA TTC TGT             |         |           |
| Aggregation substance | <i>asa1</i>              | ASA 11  | GCA CGC TAT TAC GAA CTA TGA     | 375 bp  | [4]       |
|                       |                          | TE 4    | AAA CGG CAA GAC AAG TAA ATA     |         |           |

## References

1. T. Semedo, M. Almeida Santos, P. Martins, M.F. Silva Lopes, J.J. Figueiredo Marques, R. Tenreiro, and M.T. Barreto Crespo, "Comparative study using type strains and clinical and food isolates to examine hemolytic activity and occurrence of the *cyl* operon in enterococci", *Journal of Clinical Microbiology*, vol. 41, pp. 2569-2576, 2003.
2. T.J. Eaton, and M.J. Gasson, "Molecular screening of *Enterococcus* virulence determinants and potential for genetic exchange between food and medical isolates", *Applied and Environmental Microbiology*, vol. 67, pp. 1628-1635, 2001.
3. T. Coque, J.E. Patterson, J.M. Steckelberg, and B.E. Murray, "Incidence of hemolysin, gelatinase, and aggregation substance among enterococci isolated from patients with endocarditis and other infections and from feces of hospitalized and community-based persons", *Journal of Infectious Disease*, vol. 171, pp. 1223-1229, 1995.
4. V. Vankerckhoven, T. Van Autgaerden, C. Vael, C. Lammens, S. Chapelle, R. Rossi, D. Jabes, and H. Goossens, "Development of a multiplex PCR for the detection of *asa1*, *gelE*, *cylA*, *esp*, and *hyl* genes in enterococci and survey for virulence determinants among European hospital isolates of *Enterococcus faecium*", *Journal of Clinical Microbiology*, vol. 42, pp. 4473-4479, 2004.
5. R.J. Willems, W. Homan, J. Top, M. van Santen-Verheuvell, D. Tribe, X. Manziros, C. Gaillard, C.M. Vandembroucke-Grauls, E.M. Mascini, E. van Kregten, J.D. van Embden, and M.J. Bonten, "Variant *esp* gene as a marker of a distinct genetic lineage of vancomycin-resistant *Enterococcus faecium* spreading in hospitals", *The Lancet*, vol. 357, pp. 853-855, 2001.
6. I.L. Camargo, M.S. Gilmore, and A.L. Darini, "Multilocus sequence typing and analysis of putative virulence factors in vancomycin-resistant and vancomycin-sensitive *Enterococcus faecium* isolates from Brazil", *Clinical Microbiology and Infection*, vol. 12, pp. 1123-1130, 2006.
7. I. Klare, C. Konstabel, S. Mueller-Bertling, G. Werner, B. Strommenger, C. Kettlitz, S. Borgmann, B. Schulte, D. Jonas, A. Serr, A.M. Fahr, U. Eigner, and W. Witte, "Spread of ampicillin/vancomycin-resistant *Enterococcus faecium* of the epidemic-virulent clonal complex-17 carrying the genes *esp* and *hyl* in German hospitals", *European Journal of Clinical Microbiology and Infectious Disease*, vol. 24, pp. 815-825, 2005.
